# Supplementary material for: UV and IR laser ablation study of natural organic powdered materials—an example: ICP-OES with laser ablation of spiked infant formula cast pellets
Source: Royal Society of Chemistry journal article supplement (doi:10.1039/b603850f), 2006-01-01
Supplement: b603850f-esi.pdf [file b603850f-esi.pdf]

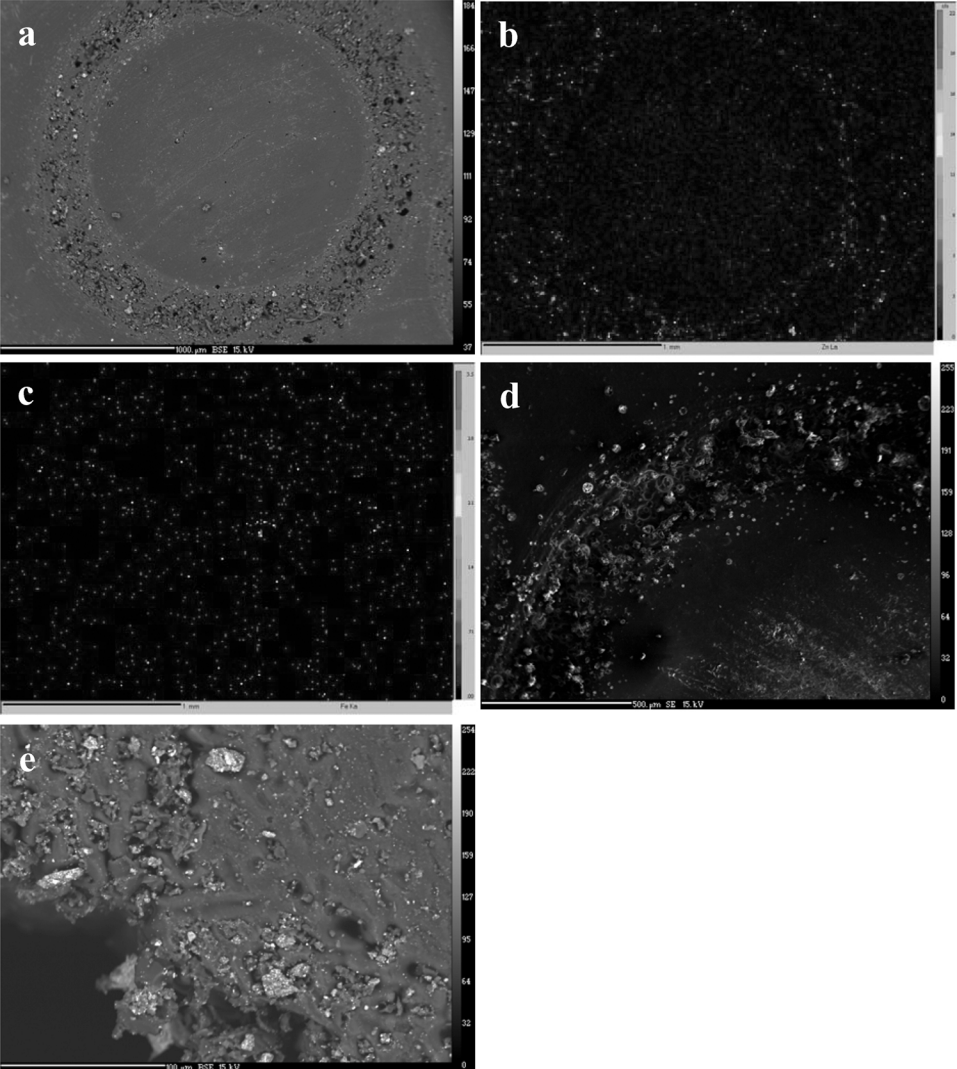

**Fig. S1** a-e BSE images: the general view of an ablation crater (a), elemental distribution of Zn (b), and Fe (c), detail of the ablation crater (d), and the crater rim (e); UV scanning mode.
